# Supplementary material for: Specific lectin biomarkers for isolation of human pluripotent stem cells identified through array-based glycomic analysis
Source: PubMed Central journal article supplement — Cell Res. 2011 Sep 6;21(11):1551–63. doi: 10.1038/cr.2011.148 (PMC3364725; doi:10.1038/cr.2011.148), 2011-09-06
Supplement: cr2011148x1.pdf [file cr2011148x1.pdf]

**Supplementary information, Table S1** The list of forty-five types of lectins printed on LecChip™ lectin microarray chips

| Lectins | Extraction Sources                 | Major binding Specificity <sup>1,2</sup>                                 |
|---------|------------------------------------|--------------------------------------------------------------------------|
| LTL     | <i>Lotus tetragonolobus</i>        | Fuca1-2Galβ1-4GlcNAc, Fuca1-3(Galβ1-4)GlcNAc                             |
| PSA     | <i>Pisum sativum</i>               | Fuca1-6GlcNAc, α-D-Glc, α-D-Man                                          |
| LCA     | <i>Lens culinaris</i>              | Fuca1-6GlcNAc, α-D-Glc, α-D-Man                                          |
| UEAI    | <i>Ulex europaeus</i>              | Fuca1-2Galβ1-4GlcNAc                                                     |
| AOL     | <i>Aspergillus oryzae</i>          | Fuca1-6GlcNAc (core fucose)                                              |
| AAL     | <i>Aleuria aurantia</i>            | Fuca1-6GlcNAc, Fuca1-3(Galβ1-4)GlcNAc                                    |
| MALI    | <i>Maackia amurensis</i>           | Neu5Acα2-3Galβ1-4GlcNAc                                                  |
| SNA     | <i>Sambucus nigra</i>              | Neu5Acα2-6Gal, Neu5Acα2-6GalNAc                                          |
| SSA     | <i>Salvia sclarea</i>              | Neu5Acα2-6Gal, Neu5Acα2-6GalNAc                                          |
| TJAI    | <i>Trichosanthes japonica</i>      | Neu5Acα2-6Gal, Neu5Acα2-6GalNAc                                          |
| PHAL    | <i>Phaseolus vulgaris</i>          | tri/tetra-antennary complex-type N-glycan                                |
| ECA     | <i>Erythrina cristagalli</i>       | Galβ1-4GlcNAc                                                            |
| RCA120  | <i>Ricinus communis</i>            | Galβ1-4GlcNAc                                                            |
| PHAE    | <i>Phaseolus vulgaris</i>          | bi-antennary complex-type N-glycan with outer Gal and bisecting GlcNAc   |
| DSA     | <i>Datura stramonium</i>           | (GlcNAcβ1-4) <sub>n</sub> , Galβ1-4GlcNAc                                |
| GSLII   | <i>Griffonia simplicifolia</i>     | agalactosylated tri/tetra antennary glycans, GlcNAc                      |
| NPA     | <i>Narcissus Pseudonarcissus</i>   | High mannose, Manα1-6Man                                                 |
| ConA    | <i>Canavalia ensiformis</i>        | High mannose, Manα1-6(Manα1-3)Man                                        |
| GNA     | <i>Galanthus nivalis</i>           | High mannose, Manα1-3Man                                                 |
| HHL     | <i>Hippeastrum Hybrid</i>          | High-Mannose, Manα1-3Man, Manα1-6Man                                     |
| ACG     | <i>Agrocybe cylindracea</i>        | Neu5Acα2-3Galβ1-4GlcNAc                                                  |
| TxLCI   | <i>Tulipa gesneriana</i>           | Manα1-3(Manα1-6)Man, bi- and tri-antennary complex-type N-glycan, GalNAc |
| BPL     | <i>Bauhinia purpurea</i>           | Galβ1-3GalNAc, GalNAc                                                    |
| TJAI    | <i>Trichosanthes japonica</i>      | Fuca1-2Galβ1→ or GalNAcβ1→ groups at their nonreducing terminals         |
| EEL     | <i>Euonymus Europaeus</i>          | blood group B antigen, Galα1-3Gal                                        |
| ABA     | <i>Agaricus bisporus</i>           | Galβ1-3GalNAc                                                            |
| LEL     | <i>Lycopersicon Esculentum</i>     | GlcNAc trimers/tetramers                                                 |
| STL     | <i>Solanum tuberosum</i>           | GlcNAc oligomers, oligosaccharide containing GlcNAc and MurNAc           |
| UDA     | <i>Urtica dioica</i>               | GlcNAcβ1-4GlcNAc, Mixture of Man5 to Man9                                |
| PWM     | <i>Phytolacca americana</i>        | (GlcNAcβ1-4) <sub>n</sub>                                                |
| Jacalin | <i>Artocarpus integrifolia</i>     | Galβ1-3GalNAc, GalNAc                                                    |
| PNA     | <i>Arachis hypogaea</i>            | Galβ1-3GalNAc                                                            |
| WFA     | <i>Wisteria floribunda</i>         | GalNAcβ1-4GlcNAc, Galβ1-3(-6)GalNAc                                      |
| ACA     | <i>Amaranthus caudatus</i>         | Galβ1-3GalNAc                                                            |
| MPA     | <i>Maclura pomifera</i>            | Galβ1-3GalNAc, GalNAc                                                    |
| HPA     | <i>Helix pomation</i>              | α-linked terminal GalNAc                                                 |
| VVA     | <i>Vicia villosa</i>               | α-linked terminal GalNAc, GalNAcα1-3Gal                                  |
| DBA     | <i>Dolichos biflorus</i>           | blood group A antigen, GalNAcα1-3GalNAc                                  |
| SBA     | <i>Glycine max</i>                 | α- or β-linked terminal GalNAc, GalNAcα1-3Gal                            |
| Calsepa | <i>Calystegia sepium</i>           | Mannose, Maltose                                                         |
| PTLI    | <i>Psophocarpus Tetragonolobus</i> | α-linked terminal GalNAc                                                 |
| MAH     | <i>Maackia amurensis</i>           | Neu5Acα2-3Galβ1-3(Neu5Acα2-6)GalNAc                                      |
| WGA     | <i>Triticum vulgaris</i>           | chitin oligomers, Neu5Ac                                                 |
| GSLI_A4 | <i>Griffonia simplicifolia</i>     | α-linked GalNAc                                                          |
| GSLI_B4 | <i>Griffonia simplicifolia</i>     | α-linked Gal                                                             |

- The information of binding specificity of each lectin printed on the LecChip™ lectin microarray chip is obtained from GPBiosciences website at [http://www.gpbio.jp/pdf/Lectin%20Specificity\\_with%20layout.pdf](http://www.gpbio.jp/pdf/Lectin%20Specificity_with%20layout.pdf)
- Fuc: fucose, Man: mannose, Gal: galactose, GlcNAc: *N*-Acetylglucosamine, GalNAc: *N*-Acetylgalactosamine, MurNAc: *N*-Acetylmuramic acid, Neu5Ac: *N*-Acetylneuraminic acid

The gray highlights indicate the thirteen priority lectins that show selectivity toward pluripotent cells
