# Supplementary material for: Specific lectin biomarkers for isolation of human pluripotent stem cells identified through array-based glycomic analysis
Source: PubMed Central journal article supplement — Cell Res. 2011 Sep 6;21(11):1551–63. doi: 10.1038/cr.2011.148 (PMC3364725; doi:10.1038/cr.2011.148), 2011-09-06
Supplement: cr2011148x2.pdf [file cr2011148x2.pdf]

**Supplementary information, Table S2** The list of culture methods for the cell samples used in the study

| Sample Name                                                                  | Culture Medium                             | Culture Condition and Passage Method                             |
|------------------------------------------------------------------------------|--------------------------------------------|------------------------------------------------------------------|
| <b>Human embryonic stem cells</b>                                            |                                            |                                                                  |
| BG01                                                                         | StemPro <sup>®</sup> hESC SFM <sup>1</sup> | Matrigel, enzymatic passage <sup>8</sup>                         |
| BG02                                                                         | StemPro <sup>®</sup> hESC SFM <sup>1</sup> | Matrigel, enzymatic passage <sup>8</sup>                         |
| BG03                                                                         | StemPro <sup>®</sup> hESC SFM <sup>1</sup> | Matrigel, enzymatic passage <sup>8</sup>                         |
| WA01                                                                         | hESC medium <sup>2</sup>                   | Radiation-inactivated MEF feeder, enzymatic passage <sup>8</sup> |
| WA07                                                                         | EctoBias medium <sup>5,6</sup>             | Matrigel <sup>6</sup>                                            |
| WA09 P31                                                                     | hESC medium <sup>7</sup>                   | Mitomycin C-treated SNL feeder, enzymatic passage <sup>9</sup>   |
| WA01 P35                                                                     | hESC medium <sup>7</sup>                   | Mitomycin C-treated SNL feeder, enzymatic passage <sup>9</sup>   |
| WA09P90_MEF/MAN                                                              | hESC medium <sup>2</sup>                   | Radiation-inactivated MEF feeder, manual passage                 |
| WA09P90_MG/MAN                                                               | StemPro <sup>®</sup> hESC SFM <sup>1</sup> | Matrigel, manual passage                                         |
| WA09P90_MEF/ACC                                                              | hESC medium <sup>2</sup>                   | Radiation-inactivated MEF feeder, enzymatic passage <sup>8</sup> |
| WA09P42_MG/ACC                                                               | StemPro <sup>®</sup> hESC SFM <sup>1</sup> | Matrigel, enzymatic passage <sup>8</sup>                         |
| WA09P90_MG/ACC                                                               | StemPro <sup>®</sup> hESC SFM <sup>1</sup> | Matrigel, enzymatic passage <sup>8</sup>                         |
| <b>Induced pluripotent stem cells from Human Dermal Fibroblasts (HDF)</b>    |                                            |                                                                  |
| 201B2 P24                                                                    | hESC medium <sup>7</sup>                   | Mitomycin C-treated SNL feeder, enzymatic passage <sup>9</sup>   |
| 201B6 P24                                                                    | hESC medium <sup>7</sup>                   | Mitomycin C-treated SNL feeder, enzymatic passage <sup>9</sup>   |
| 201B7 P24                                                                    | hESC medium <sup>7</sup>                   | Mitomycin C-treated SNL feeder, enzymatic passage <sup>9</sup>   |
| 201B7 P78                                                                    | hESC medium <sup>7</sup>                   | Mitomycin C-treated SNL feeder, enzymatic passage <sup>9</sup>   |
| 253G1 P24                                                                    | hESC medium <sup>7</sup>                   | Mitomycin C-treated SNL feeder, enzymatic passage <sup>9</sup>   |
| 253G4 P24                                                                    | hESC medium <sup>7</sup>                   | Mitomycin C-treated SNL feeder, enzymatic passage <sup>9</sup>   |
| iPS2.HDF-ALS275                                                              | hESC medium <sup>2</sup>                   | Radiation-inactivated MEF feeder, manual passage                 |
| iPS8.HDF-ALS284                                                              | hESC medium <sup>2</sup>                   | Radiation-inactivated MEF feeder, manual passage                 |
| iPS5.HDF-ALS285                                                              | hESC medium <sup>2</sup>                   | Radiation-inactivated MEF feeder, manual passage                 |
| iPS11.HDF                                                                    | StemPro <sup>®</sup> hESC SFM <sup>1</sup> | Matrigel, enzymatic passage <sup>8</sup>                         |
| iPS7.HDF                                                                     | StemPro <sup>®</sup> hESC SFM <sup>1</sup> | Matrigel, enzymatic passage <sup>8</sup>                         |
| iPS1.HDF                                                                     | StemPro <sup>®</sup> hESC SFM <sup>1</sup> | Matrigel, enzymatic passage <sup>8</sup>                         |
| <b>Induced pluripotent stem cells from Human Epidermal Melanocytes (HEM)</b> |                                            |                                                                  |
| iPS1.HEMd                                                                    | hESC medium <sup>2</sup>                   | Radiation-inactivated MEF feeder, manual passage                 |
| iPS2.HEMd                                                                    | hESC medium <sup>2</sup>                   | Radiation-inactivated MEF feeder, manual passage                 |
| <b>Cells used for reprogramming</b>                                          |                                            |                                                                  |
| aHDF                                                                         | DMEM with 10% FBS <sup>3</sup>             | enzymatic passage <sup>10</sup>                                  |
| HDF51                                                                        | DMEM with 10% FBS                          | enzymatic passage <sup>10</sup>                                  |
| HDF-ALS275                                                                   | DMEM with 10% FBS                          | enzymatic passage <sup>10</sup>                                  |
| HDF-ALS284                                                                   | DMEM with 10% FBS                          | enzymatic passage <sup>10</sup>                                  |
| HEMd                                                                         | MeIM <sup>4</sup>                          | enzymatic passage <sup>10</sup>                                  |
| <b>Other cell types</b>                                                      |                                            |                                                                  |
| SKMEL2                                                                       | RPMI1640 with 10% FBS <sup>4</sup>         | enzymatic passage <sup>10</sup>                                  |
| MALME3M                                                                      | IMDM with 10% FBS <sup>4</sup>             | enzymatic passage <sup>10</sup>                                  |
| SKMEL5                                                                       | RPMI1640 with 10% FBS <sup>4</sup>         | enzymatic passage <sup>10</sup>                                  |
| UACC257                                                                      | RPMI1640 with 10% FBS <sup>4</sup>         | enzymatic passage <sup>10</sup>                                  |
| WA07P34MNP29                                                                 | MN differentiation medium <sup>6</sup>     | Laminin <sup>6</sup>                                             |
| HREpic                                                                       | EpiCM <sup>4</sup>                         | Poly-D-Lysine, enzymatic passage <sup>10</sup>                   |
| HSkMC                                                                        | SkMCM <sup>4</sup>                         | Poly-D-Lysine, enzymatic passage <sup>10</sup>                   |
| MEF                                                                          | DMEM with 10% FBS                          | enzymatic passage <sup>10</sup>                                  |

1. StemPro<sup>®</sup> hESC serum-free medium (SFM): DMEM/F12 plus GlutaMax<sup>™</sup>-I media (Invitrogen, Carlsbad, CA) containing 12ng/ml bFGF (Stemgent, Cambridge, MA), 1.8% BSA (Invitrogen, Carlsbad, CA), 100μM β-mercaptoethanol (Invitrogen, Carlsbad, CA) and 1x StemPro<sup>®</sup> hESC supplement (Invitrogen, Carlsbad, CA)
2. hESC medium: MDEM/F12 media with L-glutamine (Invitrogen, Carlsbad, CA) containing 20% KnockOut<sup>™</sup> Serum Replacement (Invitrogen, Carlsbad, CA), 100μM non-essential amino acids (Invitrogen, Carlsbad, CA), 100μM β-mercaptoethanol (Invitrogen, Carlsbad, CA), 12ng/ml bFGF (Stemgent, Cambridge, MA)
3. This medium contains 50 units/ml penicillin and 50 μg/ml streptomycin (Invitrogen, Carlsbad, CA).
4. This medium contains 100 units/ml penicillin and 100 μg/ml streptomycin (Invitrogen, Carlsbad, CA).
5. This medium contains 20 ng/ml bFGF (Millipore, Billerica, MA).
6. Ref. 18
7. MDEM/F12 media with L-glutamine (Invitrogen, Carlsbad, CA) containing 20% KnockOut<sup>™</sup> Serum Replacement (Invitrogen, Carlsbad, CA), 100μM non-essential amino acids (Invitrogen, Carlsbad, CA), 100μM β-mercaptoethanol (Invitrogen, Carlsbad, CA), 4ng/ml bFGF (Wako, Osaka, Japan), 50 units/ml penicillin and 50 μg/ml streptomycin (Invitrogen, Carlsbad, CA)
8. StemPro<sup>®</sup> Accutase<sup>®</sup> Cell Dissociation Agent was used as the enzyme source.
9. CTX solution containing 0.25% trypsin, 100μg/ml collagenase IV, 1mM calcium chloride and 20% KnockOut<sup>™</sup> Serum Replacement was used as the enzyme source.
10. Solution containing 0.05% Trypsin and 0.02% EDTA (Invitrogen, Carlsbad, CA) was used as the enzyme source.
