# Supplementary material for: Specific lectin biomarkers for isolation of human pluripotent stem cells identified through array-based glycomic analysis
Source: PubMed Central journal article supplement — Cell Res. 2011 Sep 6;21(11):1551–63. doi: 10.1038/cr.2011.148 (PMC3364725; doi:10.1038/cr.2011.148), 2011-09-06
Supplement: cr2011148x3.pdf [file cr2011148x3.pdf]

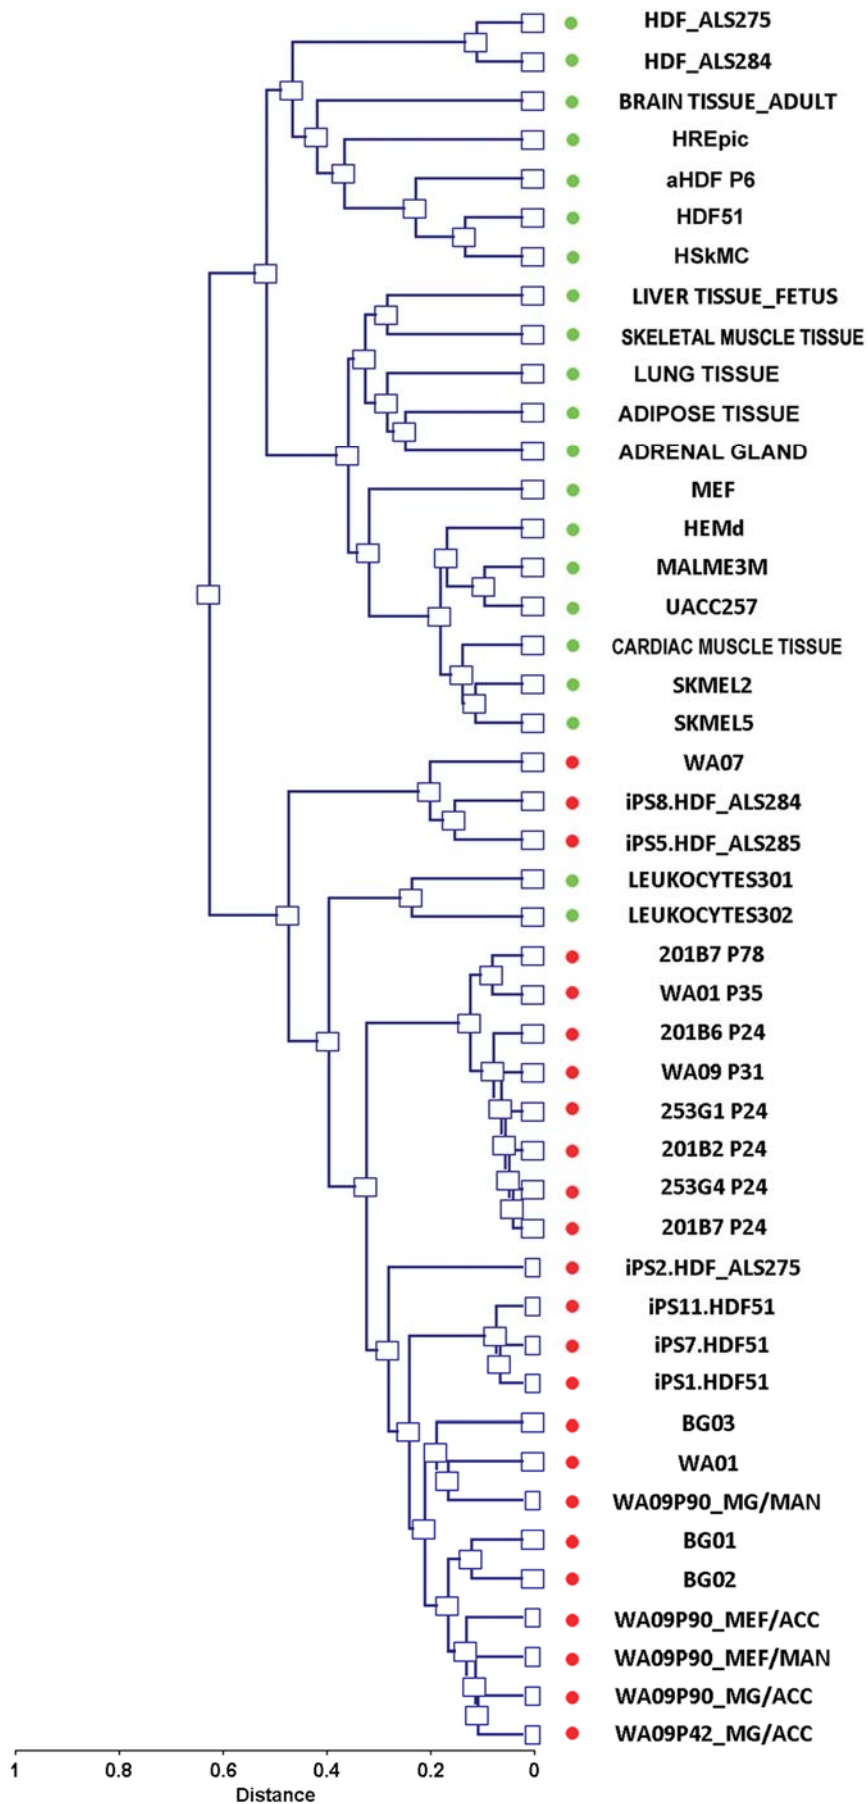

**Supplementary information, Figure S1** Clustering of cell samples based on binding profiles of thirteen priority lectins.

Hydrophobic proteins isolated from cells were labeled and analyzed by lectin microarrays as described in the Methods. Supervised hierarchical clustering of the array data for the hydrophobic fractions of 24 samples of hPSCs (12 samples of hESC and 12 samples of hiPSCs) and 21 samples of mammalian non-pluripotent cells (4 samples of HDFs, 4 samples of human melanoma cells, 1 sample of primary human melanocytes, 1 sample of MEFs, 2 samples of human leukocytes, 1 sample of human adult brain tissue, 1 sample of human fetal liver tissue, 1 sample of cardiac muscle, 1 sample of adipose tissue, 2 samples of skeletal muscle, 1 sample of adrenal gland, 1 sample of lung tissue, and 1 sample of renal epithelium) was performed using the NIA Array Analysis Tool. Pluripotent and non-pluripotent cells are indicated by red dots and green dots, respectively.
