# Supplementary material for: Specific lectin biomarkers for isolation of human pluripotent stem cells identified through array-based glycomic analysis
Source: PubMed Central journal article supplement — Cell Res. 2011 Sep 6;21(11):1551–63. doi: 10.1038/cr.2011.148 (PMC3364725; doi:10.1038/cr.2011.148), 2011-09-06
Supplement: cr2011148x6.pdf [file cr2011148x6.pdf]

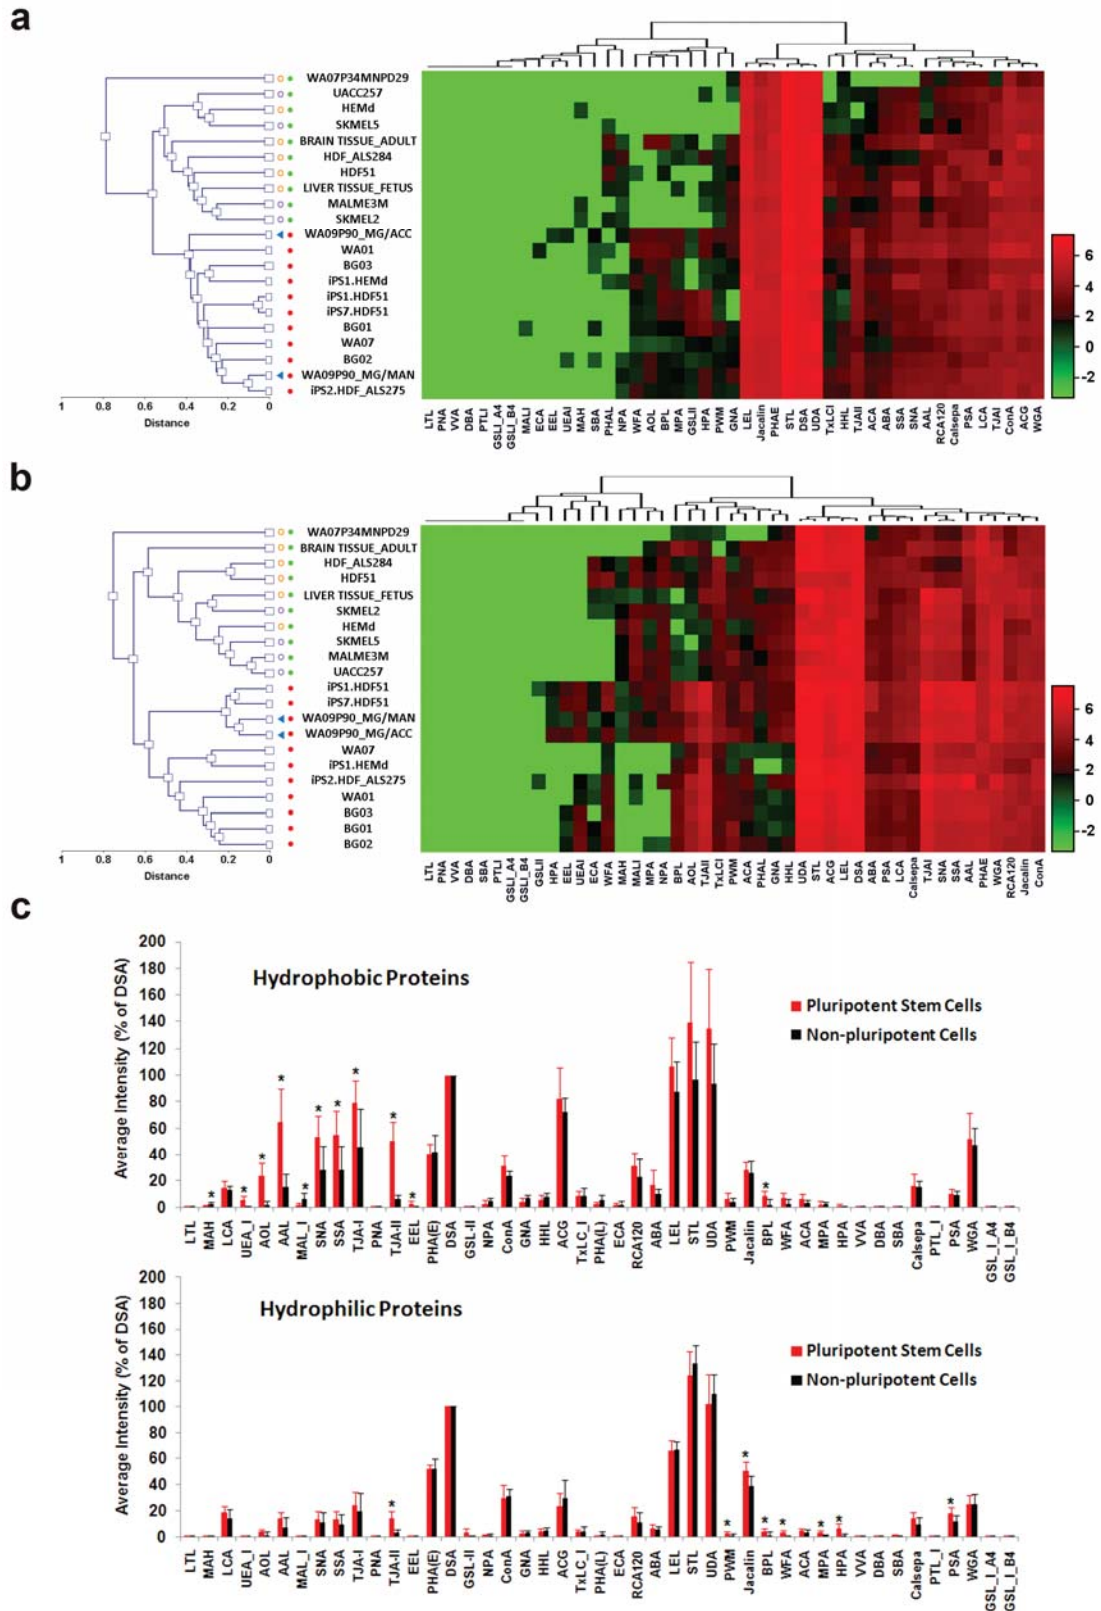

Hierarchical clustering of the array data for the hydrophilic fractions of 11 samples of hPSCs (7 samples of hESC and 4 samples of hiPSCs) and 10 samples of human non-pluripotent cells (2 samples of organ tissues and 8 samples of cultured cells) was performed using the NIA Array Analysis Tool. Pluripotent, non-pluripotent, malignant, and non-malignant cells are indicated by red dots, green dots, purple circles and orange circles, respectively. Blue triangles indicate two samples of WA09 cells cultured by different passage methods. (b) Hydrophobic proteins obtained from the same cell samples used for isolation of hydrophilic proteins were labeled and analyzed as above. The array data were examined using the NIA Array Analysis Tool to generate hierarchical clusters of the cells. (c) The average fluorescence intensities among 11 samples of hPSCs and 10 samples of non-pluripotent cells for each of 45 lectins on the microarrays were plotted. Upper panel: hydrophobic proteins. Lower panel: hydrophilic proteins. \* $P < 0.05$ , t-test
